# Supplementary material for: IGFBP2 plays an important role in heat shock protein 27-mediated cancer progression and metastasis
Source: PubMed Central journal article supplement (PMC5589635; doi:10.18632/oncotarget.18989), 2017-07-05
Supplement: oncotarget-08-54978-s001.pdf [file oncotarget-08-54978-s001.pdf]

## IGFBP2 plays an important role in heat shock protein 27-mediated cancer progression and metastasis

### SUPPLEMENTARY MATERIALS

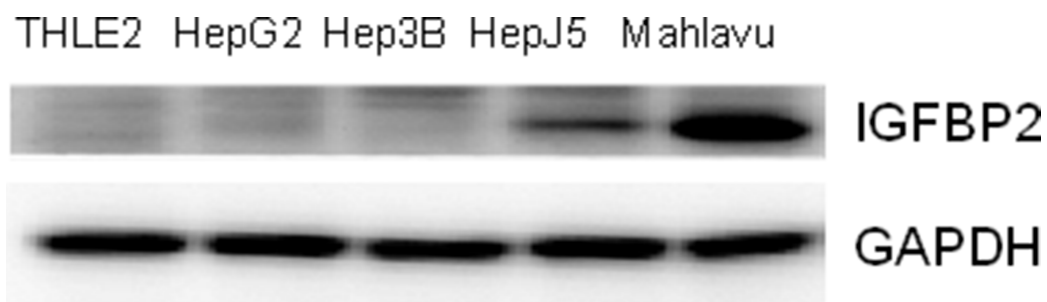

**Supplementary Figure 1: IGFBP2 expression in HCC cells.** IGFBP2 protein expression was determined by western blotting in normal liver cell line and HCC cell lines. GAPDH was used as an internal control.
